# Supplementary material for: Operando57Fe Mössbauer and XRD investigation of LixMnyFe1−yPO4/C composites (y = 0; 0.25)
Source: Royal Society of Chemistry journal article supplement (doi:10.1039/c1ra00256b), 2012-01-01
Supplement: c1ra00256b.pdf [file c1ra00256b.pdf]

ADDITIONAL DATA

Table 1: Hyperfine parameters obtained in the refinement of all  $^{57}\text{Fe}$  Mössbauer spectra for the  $\text{LiMn}_{0.25}\text{Fe}_{0.75}\text{PO}_4$  electrode in the in situ cell during the charge (isomer shift ( $\delta$ ), quadrupole splitting ( $\Delta$ ) and Mössbauer relative contributions (%))

| $x(\text{Li}^+)$ | $\text{LiMn}_{0.25}^{\text{II}}\text{Fe}_{0.75}^{\text{II}}\text{PO}_4$ |                  |     | $\text{Li}_{0.55}\text{Mn}_{0.25}^{\text{II}}\text{Fe}_{0.75}^{\text{II}}\text{PO}_4$ |                  |    | $\text{Li}_{0.55}\text{Mn}_{0.25}^{\text{II}}\text{Fe}_{0.75}^{\text{III}}\text{PO}_4$ |                  |    | $\text{Mn}_{0.25}^{\text{III}}\text{Fe}_{0.75}^{\text{III}}\text{PO}_4$ |                  |    | $\text{Li}_{0.25}\text{Mn}_{0.25}^{\text{II}}\text{Fe}_{0.75}^{\text{III}}\text{PO}_4$ |                  |    |
|------------------|-------------------------------------------------------------------------|------------------|-----|---------------------------------------------------------------------------------------|------------------|----|----------------------------------------------------------------------------------------|------------------|----|-------------------------------------------------------------------------|------------------|----|----------------------------------------------------------------------------------------|------------------|----|
|                  | $\delta$<br>mm/s                                                        | $\Delta$<br>mm/s | %   | $\delta$<br>mm/s                                                                      | $\Delta$<br>mm/s | %  | $\delta$<br>mm/s                                                                       | $\Delta$<br>mm/s | %  | $\delta$<br>mm/s                                                        | $\Delta$<br>mm/s | %  | $\delta$<br>mm/s                                                                       | $\Delta$<br>mm/s | %  |
| 1.00             | 1.227                                                                   | 2.96             | 100 | -                                                                                     | -                | -  | -                                                                                      | -                | -  | -                                                                       | -                | -  | -                                                                                      | -                | -  |
| 0.95             | 1.226                                                                   | 2.95             | 95  | -                                                                                     | -                | -  | 0.448                                                                                  | 1.08             | 5  | -                                                                       | -                | -  | -                                                                                      | -                | -  |
| 0.90             | 1.227                                                                   | 2.95             | 80  | 1.283                                                                                 | 2.72             | 10 | 0.448                                                                                  | 1.08             | 10 | -                                                                       | -                | -  | -                                                                                      | -                | -  |
| 0.84             | 1.226                                                                   | 2.95             | 66  | 1.278                                                                                 | 2.71             | 18 | 0.448                                                                                  | 1.06             | 16 | -                                                                       | -                | -  | -                                                                                      | -                | -  |
| 0.79             | 1.226                                                                   | 2.95             | 47  | 1.288                                                                                 | 2.71             | 29 | 0.435                                                                                  | 1.08             | 24 | -                                                                       | -                | -  | -                                                                                      | -                | -  |
| 0.74             | 1.220                                                                   | 2.94             | 38  | 1.286                                                                                 | 2.71             | 33 | 0.444                                                                                  | 1.02             | 29 | -                                                                       | -                | -  | -                                                                                      | -                | -  |
| 0.69             | 1.221                                                                   | 2.95             | 23  | 1.280                                                                                 | 2.72             | 38 | 0.438                                                                                  | 1.10             | 39 | -                                                                       | -                | -  | -                                                                                      | -                | -  |
| 0.64             | 1.224                                                                   | 2.94             | 12  | 1.279                                                                                 | 2.71             | 41 | 0.437                                                                                  | 1.10             | 47 | -                                                                       | -                | -  | -                                                                                      | -                | -  |
| 0.58             | 1.221                                                                   | 2.92             | 2   | 1.275                                                                                 | 2.71             | 44 | 0.434                                                                                  | 1.11             | 54 | -                                                                       | -                | -  | -                                                                                      | -                | -  |
| 0.53             | -                                                                       | -                | -   | 1.286                                                                                 | 2.71             | 39 | 0.435                                                                                  | 1.18             | 61 | -                                                                       | -                | -  | -                                                                                      | -                | -  |
| 0.48             | -                                                                       | -                | -   | 1.275                                                                                 | 2.71             | 25 | 0.434                                                                                  | 1.21             | 75 | -                                                                       | -                | -  | -                                                                                      | -                | -  |
| 0.43             | -                                                                       | -                | -   | 1.288                                                                                 | 2.71             | 24 | 0.437                                                                                  | 1.25             | 76 | -                                                                       | -                | -  | -                                                                                      | -                | -  |
| 0.37             | -                                                                       | -                | -   | 1.286                                                                                 | 2.72             | 17 | 0.442                                                                                  | 1.29             | 83 | -                                                                       | -                | -  | -                                                                                      | -                | -  |
| 0.32             | -                                                                       | -                | -   | 1.280                                                                                 | 2.71             | 18 | 0.442                                                                                  | 1.30             | 82 | -                                                                       | -                | -  | -                                                                                      | -                | -  |
| 0.25             | -                                                                       | -                | -   | -                                                                                     | -                | -  | -                                                                                      | -                | -  | 0.410                                                                   | 1.52             | 40 | 0.418                                                                                  | 1.30             | 60 |
| 0.22             | -                                                                       | -                | -   | -                                                                                     | -                | -  | -                                                                                      | -                | -  | 0.410                                                                   | 1.52             | 60 | 0.418                                                                                  | 1.30             | 40 |
| 0.17             | -                                                                       | -                | -   | -                                                                                     | -                | -  | -                                                                                      | -                | -  | 0.412                                                                   | 1.52             | 80 | 0.421                                                                                  | 1.30             | 20 |
| 0.11             | -                                                                       | -                | -   | -                                                                                     | -                | -  | -                                                                                      | -                | -  | 0.413                                                                   | 1.52             | 90 | 0.430                                                                                  | 1.30             | 10 |

Table 2: Hyperfine parameters obtained in the refinement of all  $^{57}\text{Fe}$  Mössbauer spectra for the  $\text{LiFePO}_4$  electrode in the in situ cell during the charge (isomer shift ( $\delta$ ), quadrupole splitting ( $\Delta$ ) and Mössbauer relative contributions (%))

| $x(\text{Li}^+)$ | $\text{LiFe}^{\text{II}}\text{PO}_4$ |                  |     | $\text{Fe}^{\text{III}}\text{PO}_4$ |                  |    |
|------------------|--------------------------------------|------------------|-----|-------------------------------------|------------------|----|
|                  | $\delta$<br>mm/s                     | $\Delta$<br>mm/s | %   | $\delta$<br>mm/s                    | $\Delta$<br>mm/s | %  |
| 1.00             | 1.223                                | 2.959            | 100 | -                                   | -                | -  |
| 0.95             | 1.223                                | 2.959            | 94  | 0.401                               | 1.518            | 6  |
| 0.90             | 1.218                                | 2.943            | 90  | 0.409                               | 1.518            | 10 |
| 0.84             | 1.220                                | 2.976            | 84  | 0.410                               | 1.523            | 16 |
| 0.79             | 1.218                                | 2.951            | 80  | 0.403                               | 1.516            | 20 |
| 0.74             | 1.219                                | 2.943            | 76  | 0.407                               | 1.499            | 24 |
| 0.69             | 1.218                                | 2.939            | 70  | 0.399                               | 1.514            | 30 |
| 0.64             | 1.219                                | 2.930            | 66  | 0.392                               | 1.517            | 34 |
| 0.58             | 1.218                                | 2.940            | 57  | 0.407                               | 1.495            | 42 |
| 0.53             | 1.221                                | 2.948            | 54  | 0.408                               | 1.513            | 46 |
| 0.48             | 1.216                                | 2.922            | 47  | 0.407                               | 1.528            | 53 |
| 0.43             | 1.226                                | 2.924            | 41  | 0.416                               | 1.525            | 59 |
| 0.37             | 1.221                                | 2.921            | 35  | 0.412                               | 1.524            | 65 |
| 0.32             | 1.218                                | 2.922            | 27  | 0.410                               | 1.530            | 73 |
| 0.25             | 1.221                                | 2.921            | 23  | 0.411                               | 1.530            | 77 |
| 0.22             | 1.218                                | 2.928            | 18  | 0.414                               | 1.524            | 82 |
| 0.17             | 1.224                                | 2.919            | 12  | 0.418                               | 1.528            | 88 |
| 0.11             | 1.223                                | 2.925            | 5   | 0.412                               | 1.530            | 95 |
